# Supplementary material for: Guanidine modified polyethyleneimine-g-polyethylene glycol nanocarriers for long interfering RNA (liRNA) based advanced anticancer therapy
Source: Royal Society of Chemistry journal article supplement (doi:10.1039/c4tb01621a), 2014-10-14
Supplement: c4tb01621a1.pdf [file c4tb01621a1.pdf]

## Guanidine Modified Polyethyleneimine-g-Polyethylene Glycol Nanocarriers for Long Interfering RNA (liRNA) based Advanced Anticancer Therapy

Sajeesh S, Jeong Yong Choe, Tae Yeon Lee and Dong-ki Lee

Global Research Laboratory for RNAi Medicine  
Department of Chemistry  
Sungkyunkwan University, Suwon 440-746  
Republic of Korea

### Supporting information

Table S1- Quantification of degree of guanidination in bPEI-g-PEG

| Sample code     | % of GU* |
|-----------------|----------|
| bPEI-g-PEG      | -        |
| GU bPEI-g-PEG 1 | -        |
| GU bPEI-g-PEG 2 | 6.7      |
| GU bPEI-g-PEG 3 | 12.9     |
| GU bPEI-g-PEG 4 | 16.2     |
| GU bPEI-g-PEG 5 | 21.72    |

\*GU content in the polymer was determined by Sakaguchi assay

Table S2 – IC 50 values for Dox in HeLa/U87MG cells

| <b>Cells</b> | <b>IC-50 (<math>\mu</math>M)<br/>Control cells (Dox<br/>alone)</b> | <b>IC-50 (<math>\mu</math>M)<br/>siRNA treated cells<br/>(siRNA+Dox)</b> | <b>IC-50 (<math>\mu</math>M)<br/>liRNA treated<br/>cells<br/>(liRNA+Dox)</b> |
|--------------|--------------------------------------------------------------------|--------------------------------------------------------------------------|------------------------------------------------------------------------------|
| U87MG        | 1.929                                                              | 2.78                                                                     | 0.779                                                                        |
| HeLa         | 1.107                                                              | 0.902                                                                    | 0.203                                                                        |

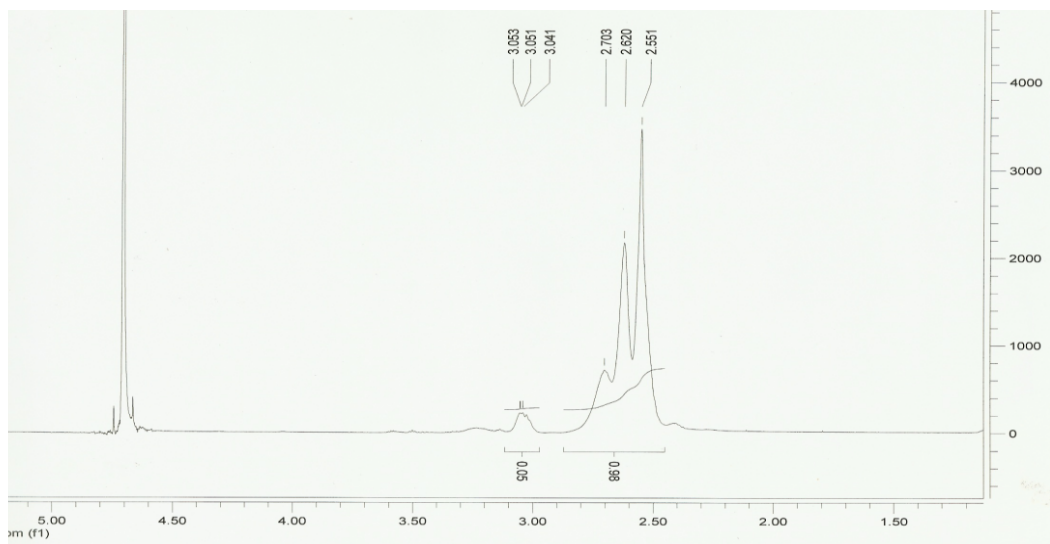

**A**

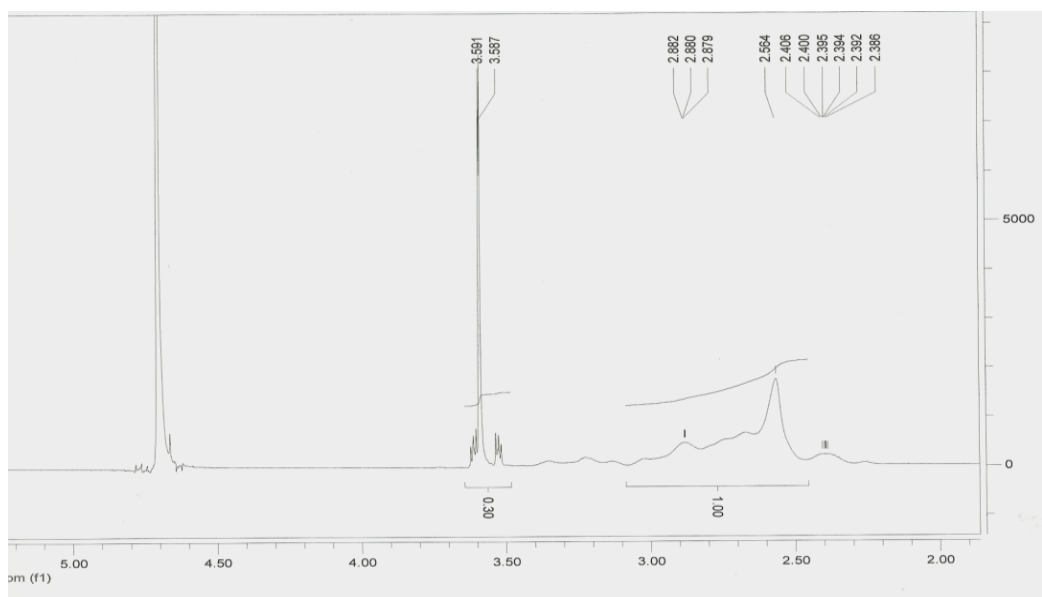

**B**

Figure S1- <sup>1</sup>H-NMR spectra of (A) bPEI and (B) bPEI-g-PEG. <sup>1</sup>H NMR spectra was obtained with Bruker Ascend™ 500 NMR using D<sub>2</sub>O as solvent.

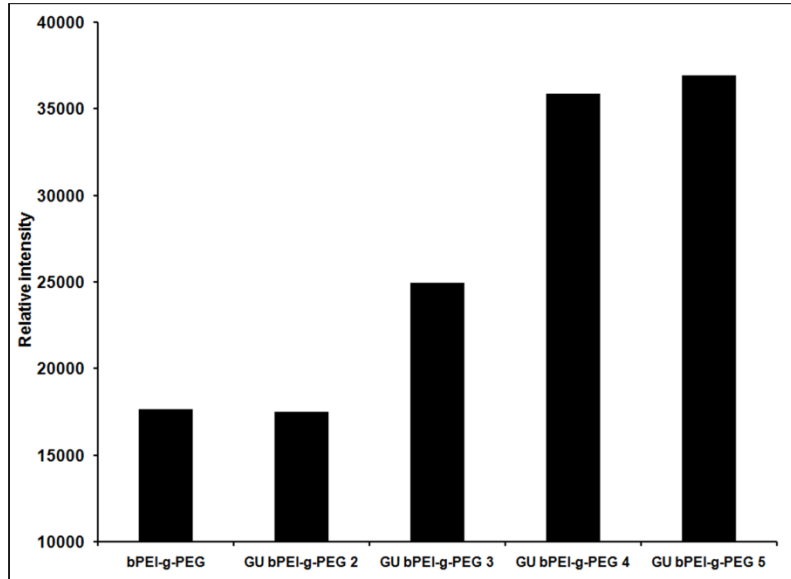

Figure S2- NC-3000 based quantification of liRNA uptake in U87MG cells using bPEI-g-PEG with varying degree of guanidination. Cells were treated with 100 nM liRNA complex (N/P 5) for 3h and intracellular Cy3 intensity was quantified by NC-3000 method

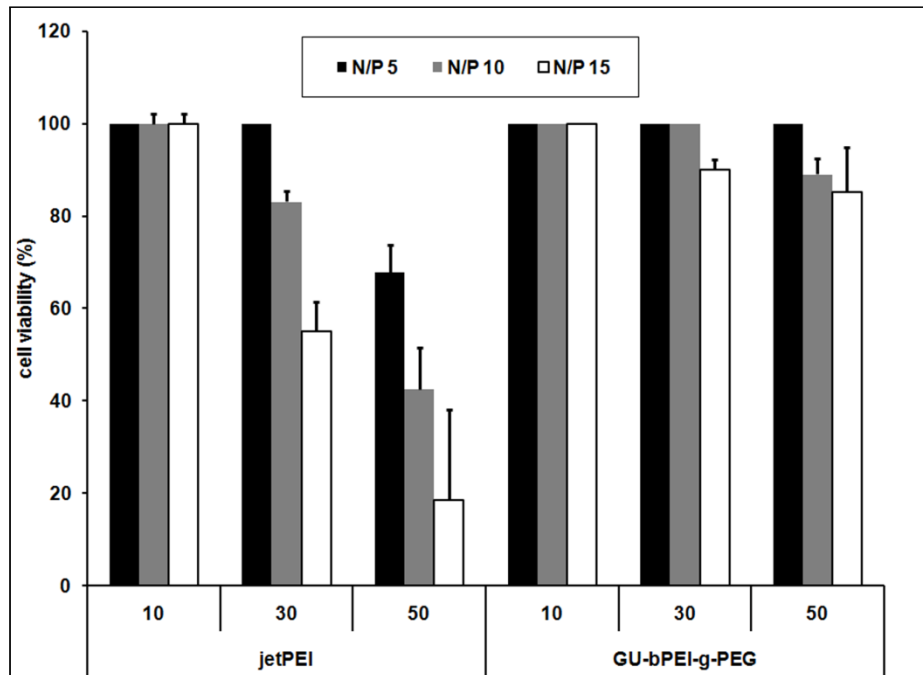

Figure S3- liRNA induced toxicity under transfection conditions. HeLa cells were treated with liRNA complex at different N/P ratios (5,10 and 15) and RNA concentration (10,30 and 50 nM). jetPEI and GU bPEI-g-PEG were used as the transfection reagents. Cell viability was assessed immediately after transfection by MTT assay.

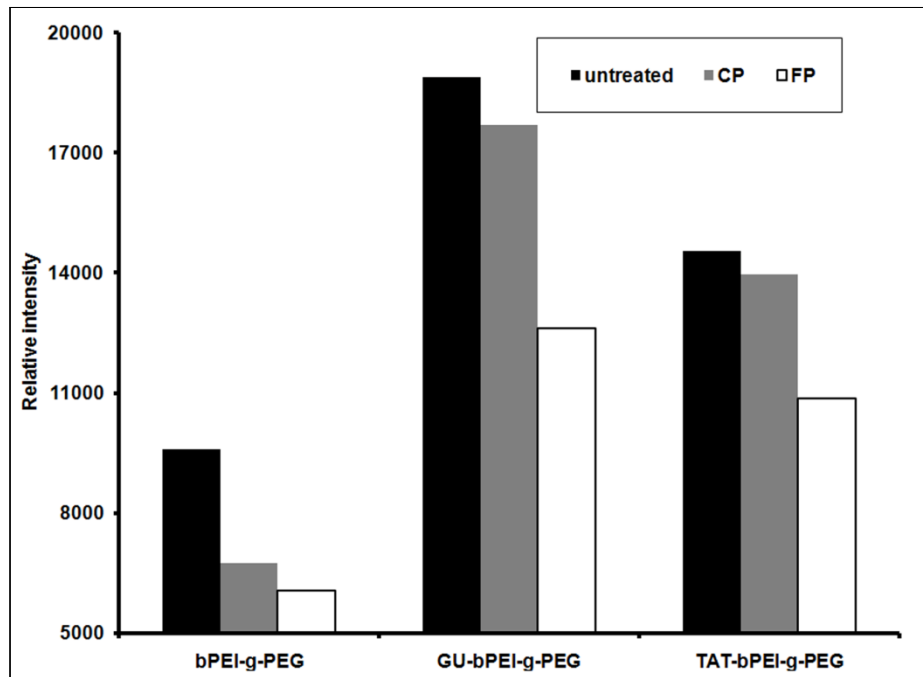

Figure S4- Effect of endocytic inhibitors on the cellular uptake siRNA complex. HeLa cells used for these studies were pretreated with chlorpromazine (CP, 2  $\mu\text{g}/\text{mL}$ ) to block clathrin mediated endocytosis and filipin III (FP, 5  $\mu\text{g}/\text{mL}$ ) to inhibit caveolae mediated endocytosis. Cells were then transfected with 50 nM siRNA complex with either bPEI-g-PEG, GU bPEI-g-PEG or TAT bPEI-g-PEG at N/P 5. Cellular uptake of siRNA was then compared between treated and untreated cells by NC-3000 method.
